# Supplementary material
Source: Research Square preprint supplement (doi:10.21203/rs.3.rs-9408247/v1)
Supplement: Supplementary file 1 [file 2f8b099fbc7a55b989f76f74.docx]

**Limits of Coral Thermal Tolerance in Tropical South Atlantic Coastal Reefs after the Fourth Global Mass Bleaching Event**

Thales Jean Vidal¹*; Ágatha Naiara Ninow²; Ana Lidia Gaspar¹; Beatriz Fernandes³; Thiago Buchianeri⁵; Mauro Maida³; Leonardo Messias²; Camila da Silveira Brasil⁴; Beatrice Padovani Ferreira³

¹ Instituto Recifes Costeiros, Tamandaré, Pernambuco, Brazil

² National Center for Research and Conservation of Marine Biodiversity in the Northeast (CEPENE-Tamandaré ICMBio), Tamandaré, Pernambuco, Brazil

³ Federal University of Pernambuco, Department of Oceanography, Recife, Pernambuco, Brazil

⁴ Federal University of Bahia, Department of Oceanography, Salvador, Bahia, Brazil

⁵ University of São Paulo, Department of Oceanography, São Paulo, Brazil.

**Materials and methods:**

**Table S1.** Distribution of sampled colonies by site. P1 (Ilha da Barra), P2 (Csul Ilha da Barra), P3 (Pirambu Oeste), P4 (Pirambu Csul), P5 (Pirambu Canal), P6 (Poço da Elga), and P7 (Pirambu do Norte).

| **Species** | **P1** | **P2** | **P3** | **P4** | **P5** | **P6** | **P7** | **Addition** |
| --- | --- | --- | --- | --- | --- | --- | --- | --- |
| ***M. cavernosa*** | 13 | 4 | 0 | 5 | 7 | 12 | 12 | 53 |
| ***M. alcicornis*** | 13 | 8 | 9 | 3 | 3 | 11 | 12 | 59 |
| ***M. hispida*** | 5 | 0 | 2 | 6 | 1 | 8 | 6 | 28 |
| ***M. harttii*** | 1 | 3 | 0 | 4 | 0 | 0 | 1 | 9 |
| ***Siderastrea sp.*** | 13 | 0 | 0 | 6 | 17 | 2 | 15 | 53 |
| ***P. astreoides*** | 0 | 0 | 0 | 1 | 9 | 1 | 3 | 14 |
| ***A. humilis*** | 0 | 0 | 4 | 10 | 0 | 8 | 22 | 44 |
| ***S. wellsi*** | 0 | 0 | 0 | 30 | 0 | 0 | 0 | 30 |
| **Total** | 47 | 19 | 15 | 70 | 38 | 45 | 71 | 290 |

**Results:**


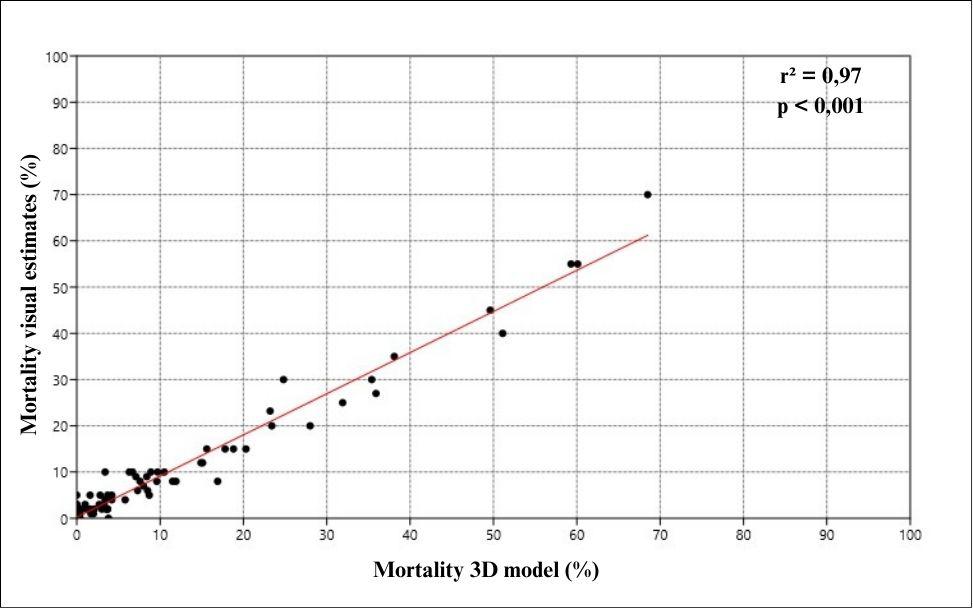


**Figure S1.** Linear regression of mortality rates estimated from health assessments and those derived from 3D models for *M. cavernosa.*


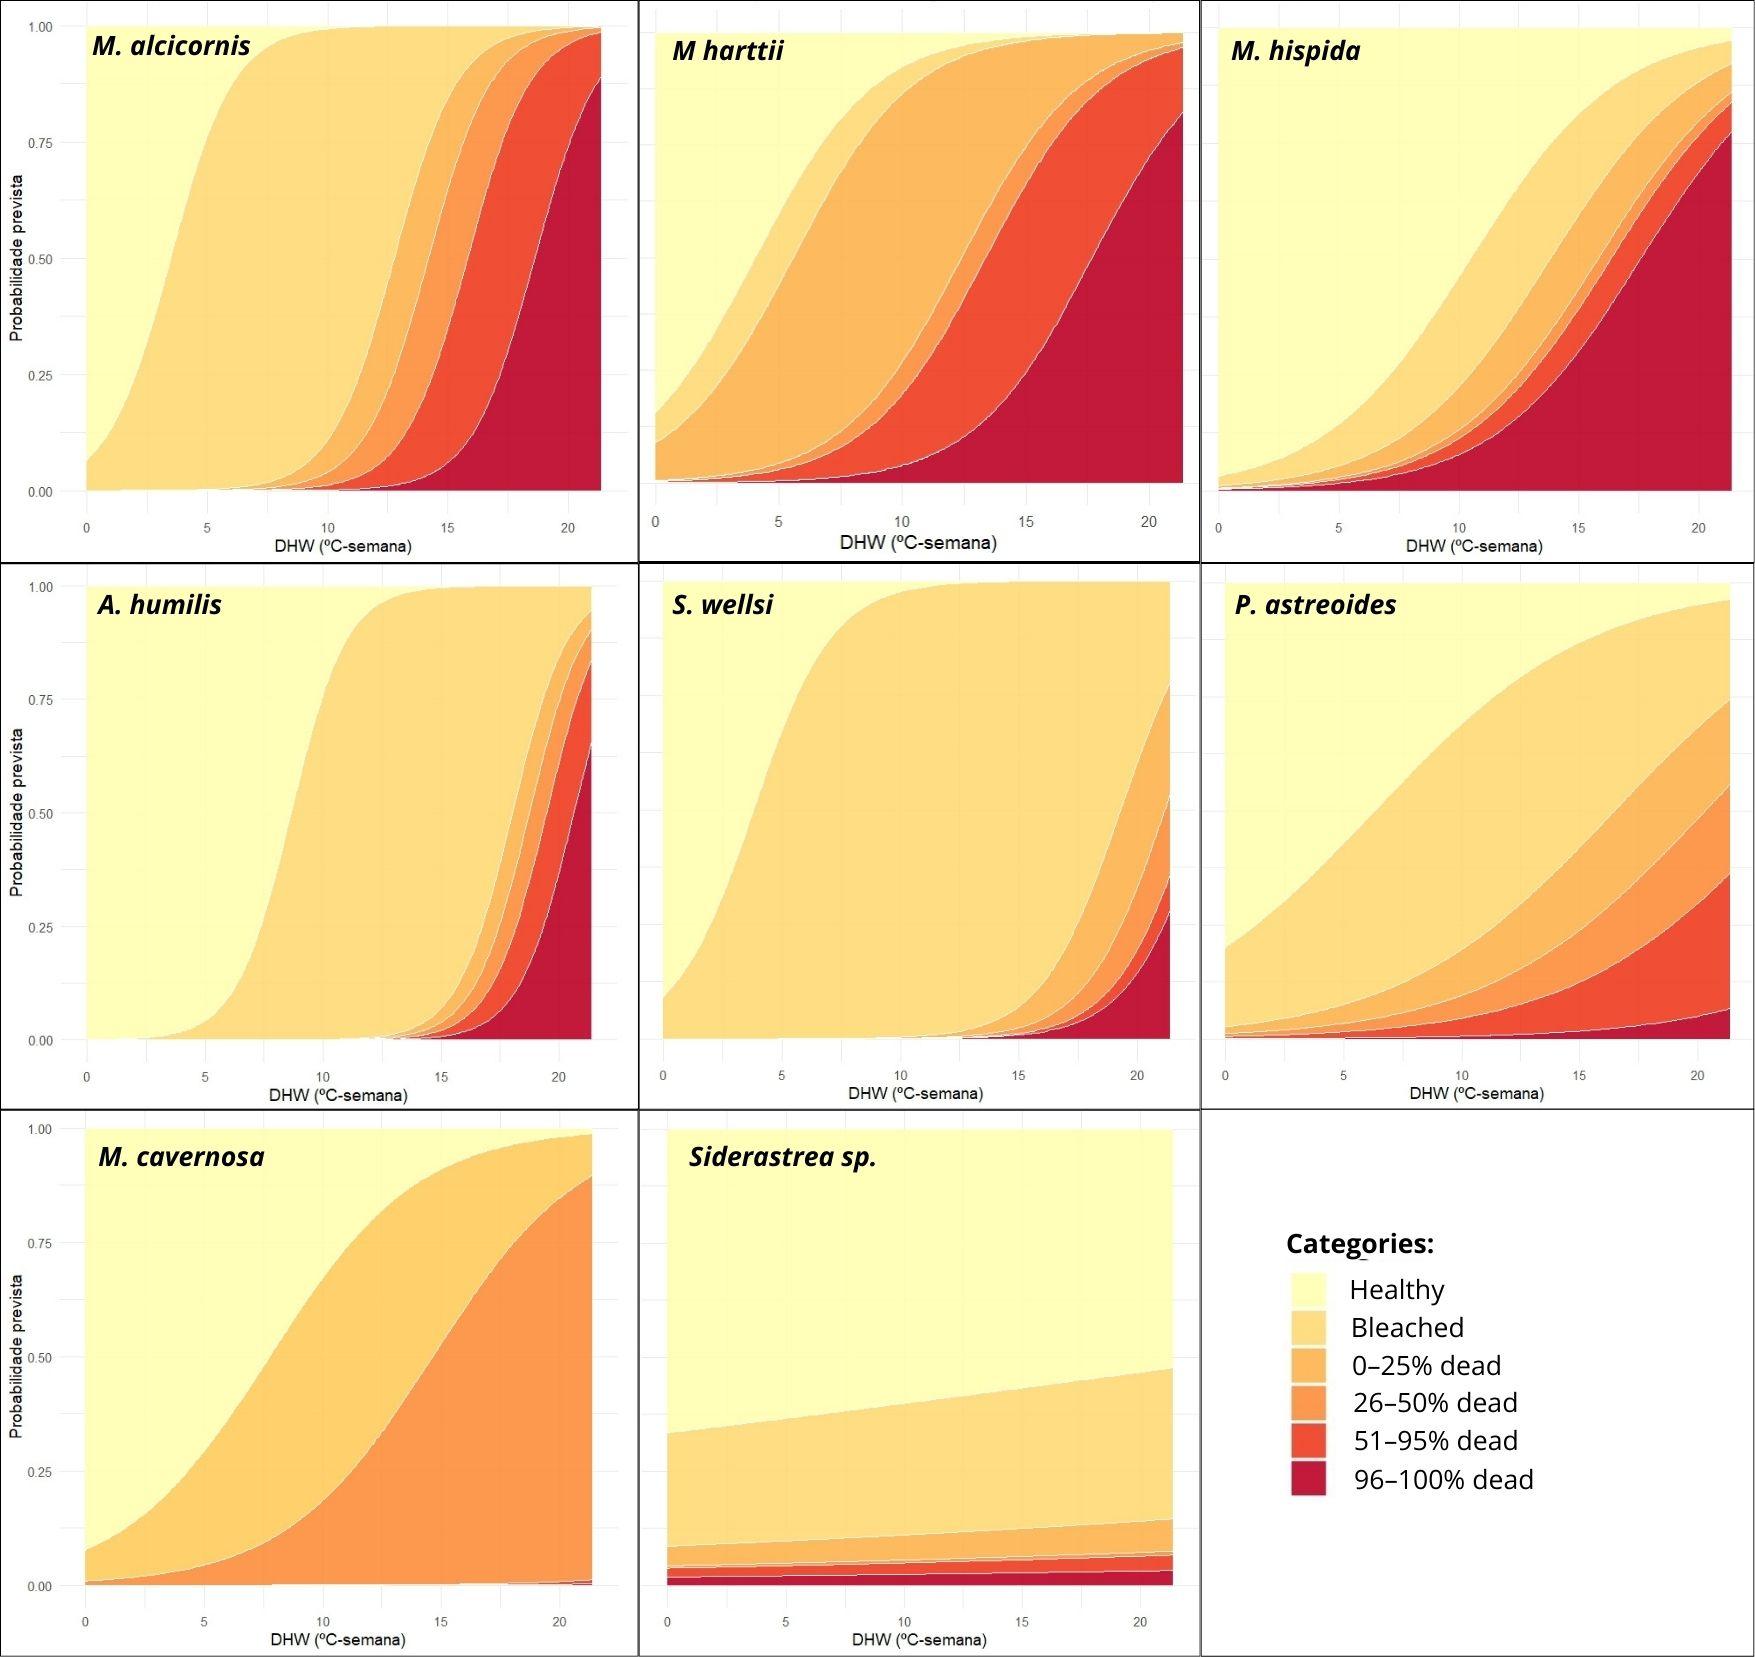


**Figure S2**. Model predictions of the probability that colonies of the eight studied species (n = 290) exhibited different health states based on the progression of Degree Heating Week (°C/week) observed during the 2024 event. Each color represents a health category, with lighter shades indicating healthy colonies and darker shades indicating colonies with 96–100% mortality.

**Table S2**: Species-specific ordinal model outputs. Panel A presents model coefficients and fit statistics for the effect of DHW on colony condition categories, whereas Panel B reports the estimated thresholds separating the ordinal health and mortality classes.

*Panel A. Model summary by species*

| **Species** | **Estimate** | **SE** | **z-value** | **p-value** | **N** | **AIC** | **Model** |
| --- | --- | --- | --- | --- | --- | --- | --- |
| *M. cavernosa* | 2.509 | 0.248 | 10.140 | <0.001 | 308 | 488.46 | CLMM |
| *M. alcicornis* | 5.197 | 0.436 | 11.930 | <0.001 | 325 | 472.54 | CLMM |
| *A. humilis* | 5.300 | 0.720 | 7.300 | <0.001 | 206 | 410.32 | CLMM |
| *M. harttii* | 2.670 | 0.510 | 5.220 | <0.001 | 58 | 97.77 | CLM |
| *P. astreoides* | 1.480 | 0.400 | 3.640 | <0.001 | 38 | 120.38 | CLM |
| *M. hispida* | 1.680 | 0.240 | 6.830 | <0.001 | 170 | 377.43 | CLMM |
| *S. wellsi* | 2.760 | 0.510 | 5.400 | <0.001 | 131 | 261.59 | CLMM |
| *Siderastrea* sp. | 0.221 | 0.188 | 1.177 | 0.239 | 126 | 295.57 | CLMM |

*Panel B. Category thresholds*

| **Threshold** | ***M. cavernosa*** | ***M. alcicornis*** | ***A. humilis*** | ***M. harttii*** | ***P. astreoides*** | ***M. hispida*** | ***S. wellsi*** | ***Siderastrea* sp.** |
| --- | --- | --- | --- | --- | --- | --- | --- | --- |
| **Healthy → Bleached** | -2.39 | -10.34 | -7.25 | -5.65 | -1.88 | -2.13 | -9.24 | 0.26 |
| **Bleached → 0–25% mortality** | -0.24 | -2.65 | 0.77 | -5.02 | 0.10 | -1.01 | -0.04 | 1.94 |
| **0–25% → 26–50% mortality** | 6.06 | -1.55 | 1.38 | -2.17 | 0.87 | -0.38 | 1.08 | 2.68 |
| **26–50% → 51–95% mortality** | 7.53 | -0.30 | 2.00 | -1.77 | 1.59 | -0.21 | 1.80 | 2.81 |
| **51–95% → 96–100% mortality** | 0.00 | 1.85 | 2.99 | 0.03 | 3.51 | 0.16 | 2.16 | 3.55 |


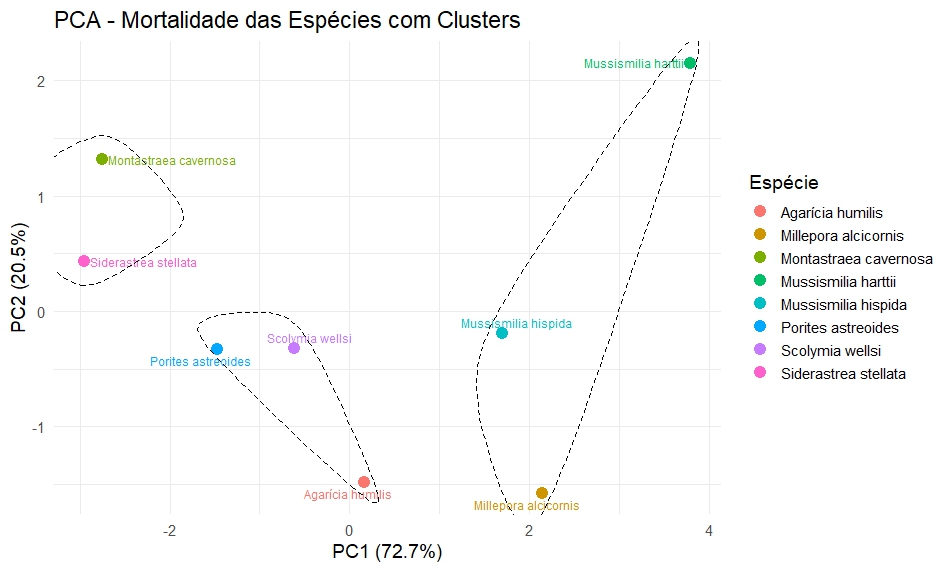


**Figure S3.** Species clustering based on the progression of mortality observed for the monitored species throughout 2024 (PCA and hierarchical clustering).


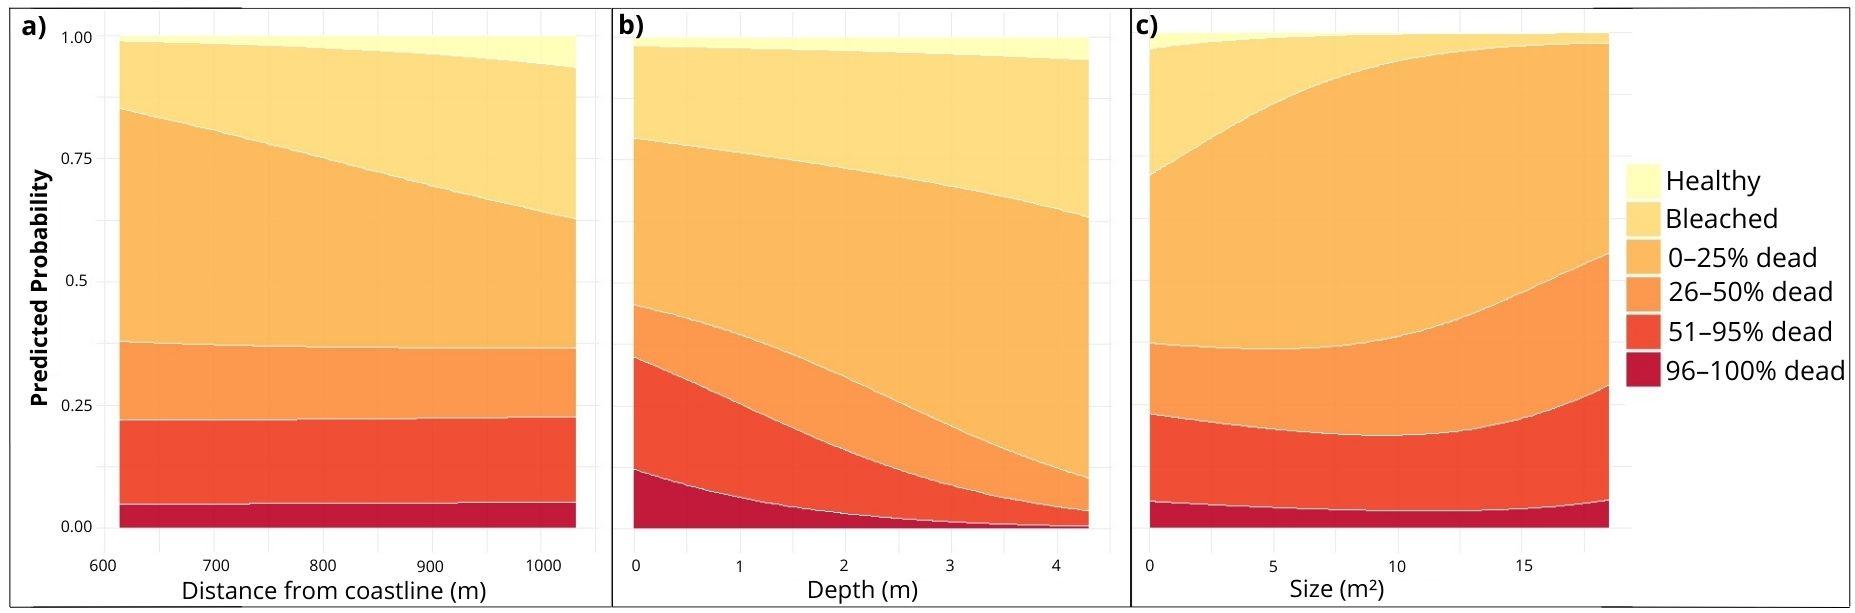


**Figure S4.** Model predictions of the probability that colonies of *M. alcicornis* and *M. cavernosa* (n = 106) exhibit different health states based on distance from the coast (a), depth (b), and colony size (c). Each color represents a health category, with lighter shades indicating healthy colonies and darker shades indicating colonies with 96–100% mortality.

**Table S3**: Summary of the cumulative link mixed model (CLMM) fitted to colony condition categories, including fixed effects, random effects, model fit statistics, and threshold estimates.

| **Section** | **Variable** | **Estimate** | **Standard Error** | **z value** | **p value** | **n** |
| --- | --- | --- | --- | --- | --- | --- |
| **Fixed effects** | Species (*M. cavernosa*) | -4.510 | 0.710 | -6.360 | <0.001 |  |
|  | Size (standardized) | -0.160 | 0.190 | -0.840 | 0.400 |  |
|  | Depth (standardized) | -0.660 | 0.340 | -1.910 | 0.056 |  |
|  | DHW (standardized) | 5.860 | 0.360 | 16.400 | <0.001 |  |
|  | Distance (standardized) | 0.020 | 0.280 | 0.090 | 0.930 |  |
|  | Species × Size | 0.780 | 1.310 | 0.590 | 0.554 |  |
|  | Species × Depth | 0.480 | 0.420 | 1.140 | 0.256 |  |
|  | Species × DHW | -3.870 | 0.340 | -11.550 | <0.001 |  |
|  | Species × Distance | -0.430 | 0.420 | -1.030 | 0.306 |  |
|  | Depth × Distance | -0.240 | 0.220 | -1.090 | 0.278 |  |
| **Random effects** | ID | 1.16 | 1.08 |  |  | 106 |
|  | Site | 0.49 | 0.70 |  |  | 7 |
| **Model information** | N observations | 616 |  |  |  |  |
|  | AIC | 1079.41 |  |  |  |  |
|  | LogLik | -522.71 |  |  |  |  |
| **Category thresholds** | **Healthy → Bleached** | -7.52 | 0.57 | -13.25 |  |  |
|  | **Bleached → 0–25% mortality** | -4.59 | 0.47 | -9.77 |  |  |
|  | **0–25% mortality → 26–50% mortality** | -0.90 | 0.42 | -2.13 |  |  |
|  | **26–50% mortality → 51–95% mortality** | 0.26 | 0.41 | 0.63 |  |  |
|  | **51–95% mortality → 96–100% mortality** | 2.19 | 0.42 | 5.19 |  |  |


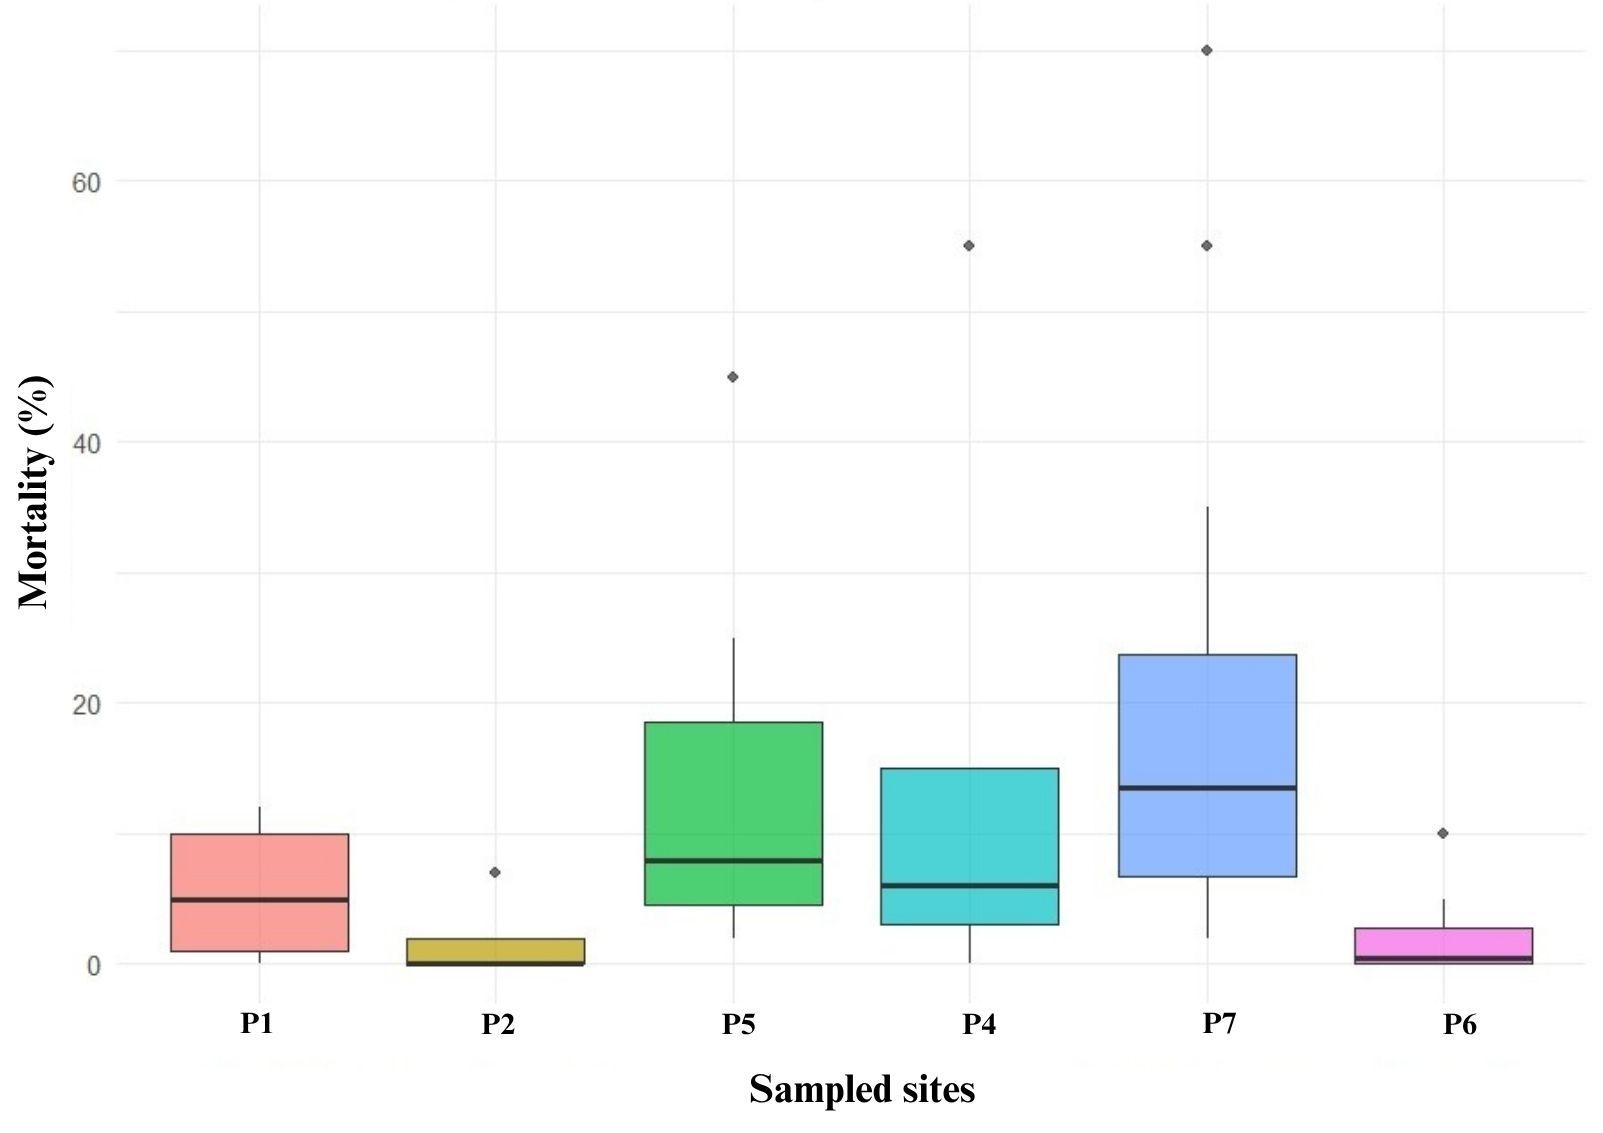


**Figure S5.** Final mortality of *M. cavernosa* recorded at each site (P1, P2, P4, P5, P6 and P7) during the last sampling campaign (Dec. 2024). Each color represents a site with monitored *M. cavernosa* colonies.

**Table S4**: Species-specific cumulative link mixed model (CLMM) outputs for the temporal analysis evaluating the effect of Degree Heating Weeks (DHW) on coral mortality categories. Panel A presents model coefficients and fit statistics, whereas Panel B reports the estimated thresholds separating ordinal mortality classes. All models included year and site as random effects.

*Panel A. Model coefficients and fit statistics*

| **Species** | **Estimate** | **SE** | **z-value** | **p-value** | **N** | **AIC** | **Model** |
| --- | --- | --- | --- | --- | --- | --- | --- |
| *M. alcicornis* | 3.342 | 1.000 | 3.315 | <0.001 | 298 | 652.57 | CLMM |
| *A. humilis* | 2.726 | 1.057 | 2.579 | 0.010 | 714 | 634.80 | CLMM |
| *M. hispida* | 1.518 | 0.498 | 3.049 | 0.002 | 56 | 107.73 | CLMM |
| *P. astreoides* | 0.618 | 0.300 | 2.058 | 0.040 | 642 | 820.76 | CLMM |
| *Siderastrea* sp. | 0.011 | 0.109 | 0.103 | 0.918 | 1753 | 2292.83 | CLMM |

*Panel B. Category thresholds*

| **Threshold** | ***M. alcicornis*** | ***A. humilis*** | ***M. hispida*** | ***P. astreoides*** | ***Siderastrea* sp.** |
| --- | --- | --- | --- | --- | --- |
| Healthy → 0–25% mortality | -2.180 | 2.666 | -0.459 | 1.603 | 1.295 |
| 0–25% → 26–50% mortality | -1.421 | 3.725 | NA | 2.329 | 2.177 |
| 26–50% → 51–95% mortality | -0.556 | 4.683 | 0.492 | 3.412 | 3.370 |
| 51–95% → 96–100% mortality | 0.893 | 8.790 | 0.797 | 5.998 | 5.422 |
